# Supplementary material for: Revealing the sulfur dioxide emission reductions in China by assimilating surface observations in WRF-Chem
Source: Copernicus journal article supplement (doi:10.5194/acp-21-4357-2021), 2021-03-22
Supplement: Supplementary file 1 [file acp-21-4357-2021-supplement.pdf]

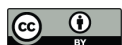

*Supplement of*

## **Revealing the sulfur dioxide emission reductions in China by assimilating surface observations in WRF-Chem**

**Tie Dai et al.**

*Correspondence to:* Tie Dai (daitie@mail.iap.ac.cn)

The copyright of individual parts of the supplement might differ from the article licence.

## Supplements

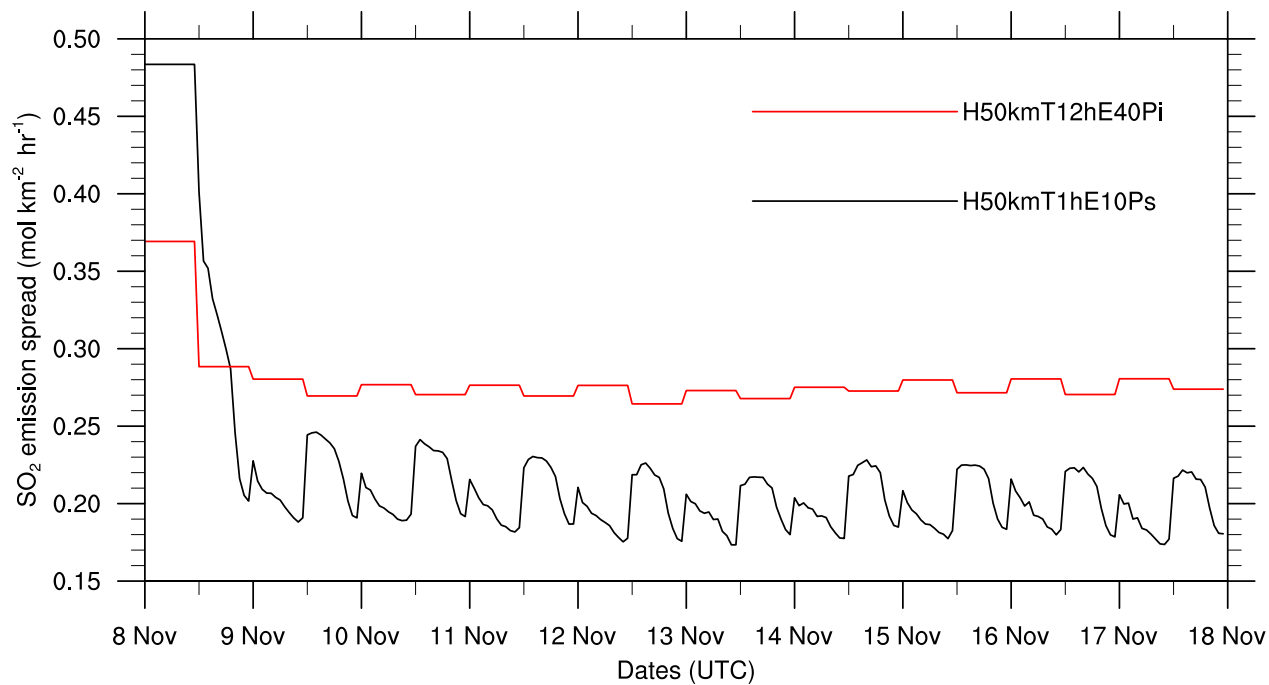

Figure S1. Time series of the hourly ensemble spreads of the forecast SO<sub>2</sub> emissions averaged over China from 00:00 UTC 8 November to 23:00 UTC 17 November 2016.

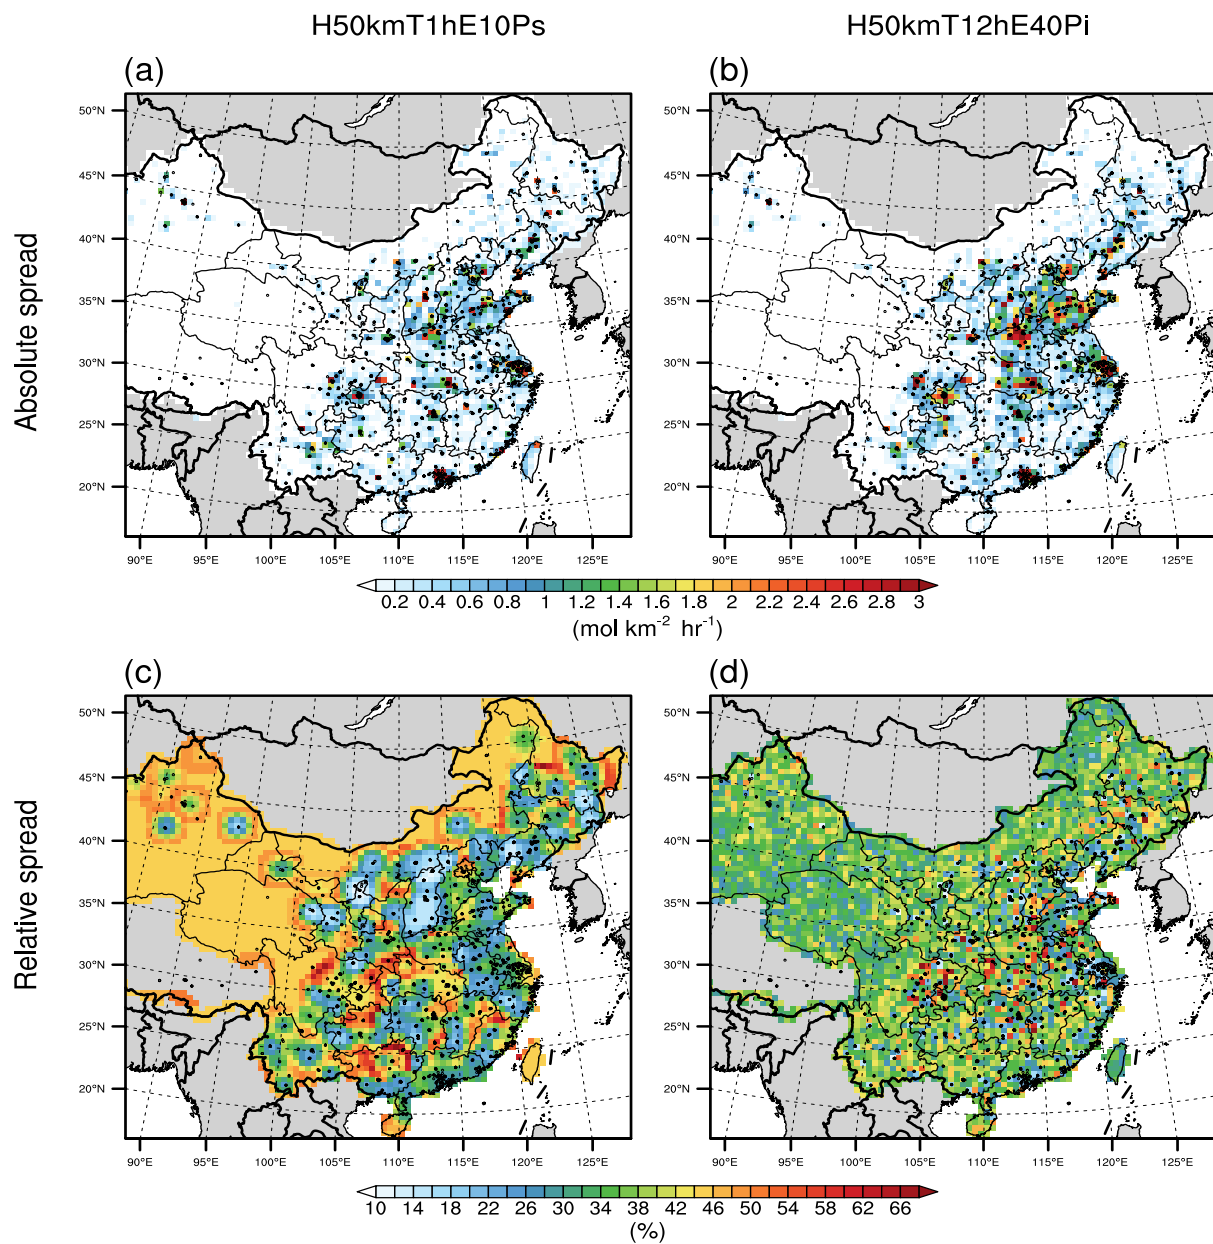

**Figure S2.** Spatial distributions of the ensemble spreads of the forecast SO<sub>2</sub> emissions at 00:00 UTC November 13. The locations of the assimilated observation sites of the China National Environmental Monitoring Centre (CNEMC) are shown as the black circles.

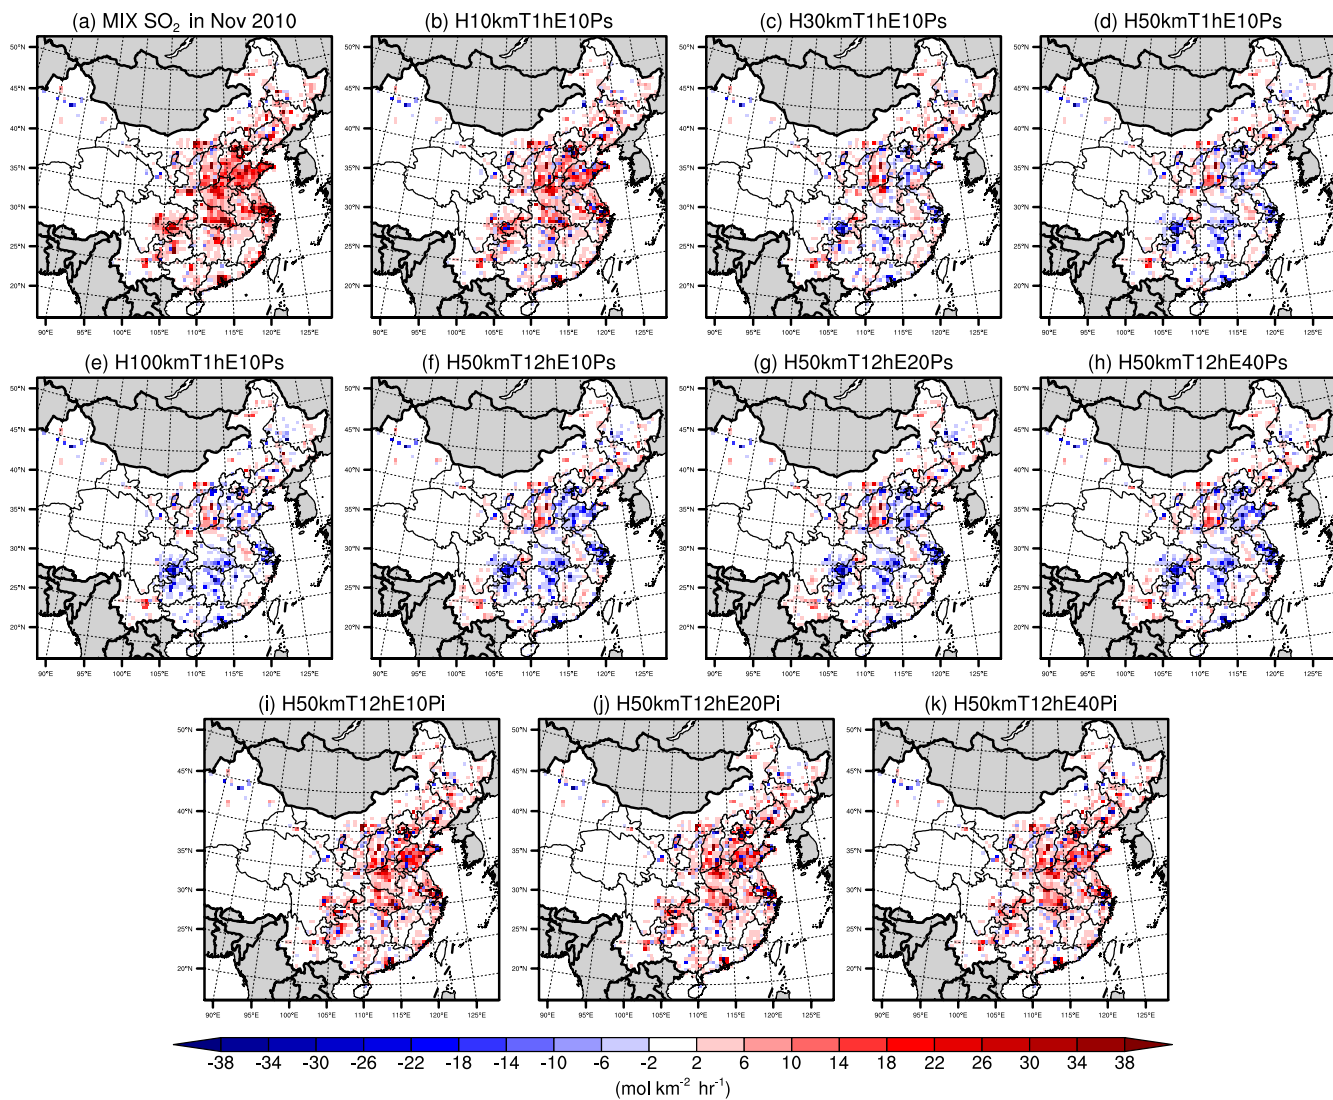

**Figure S3. Spatial distributions of the mean differences of the MIX (a) and inverted SO<sub>2</sub> emissions in various data assimilation experiments (b-k) minus the MEIC ones in November 2016.**

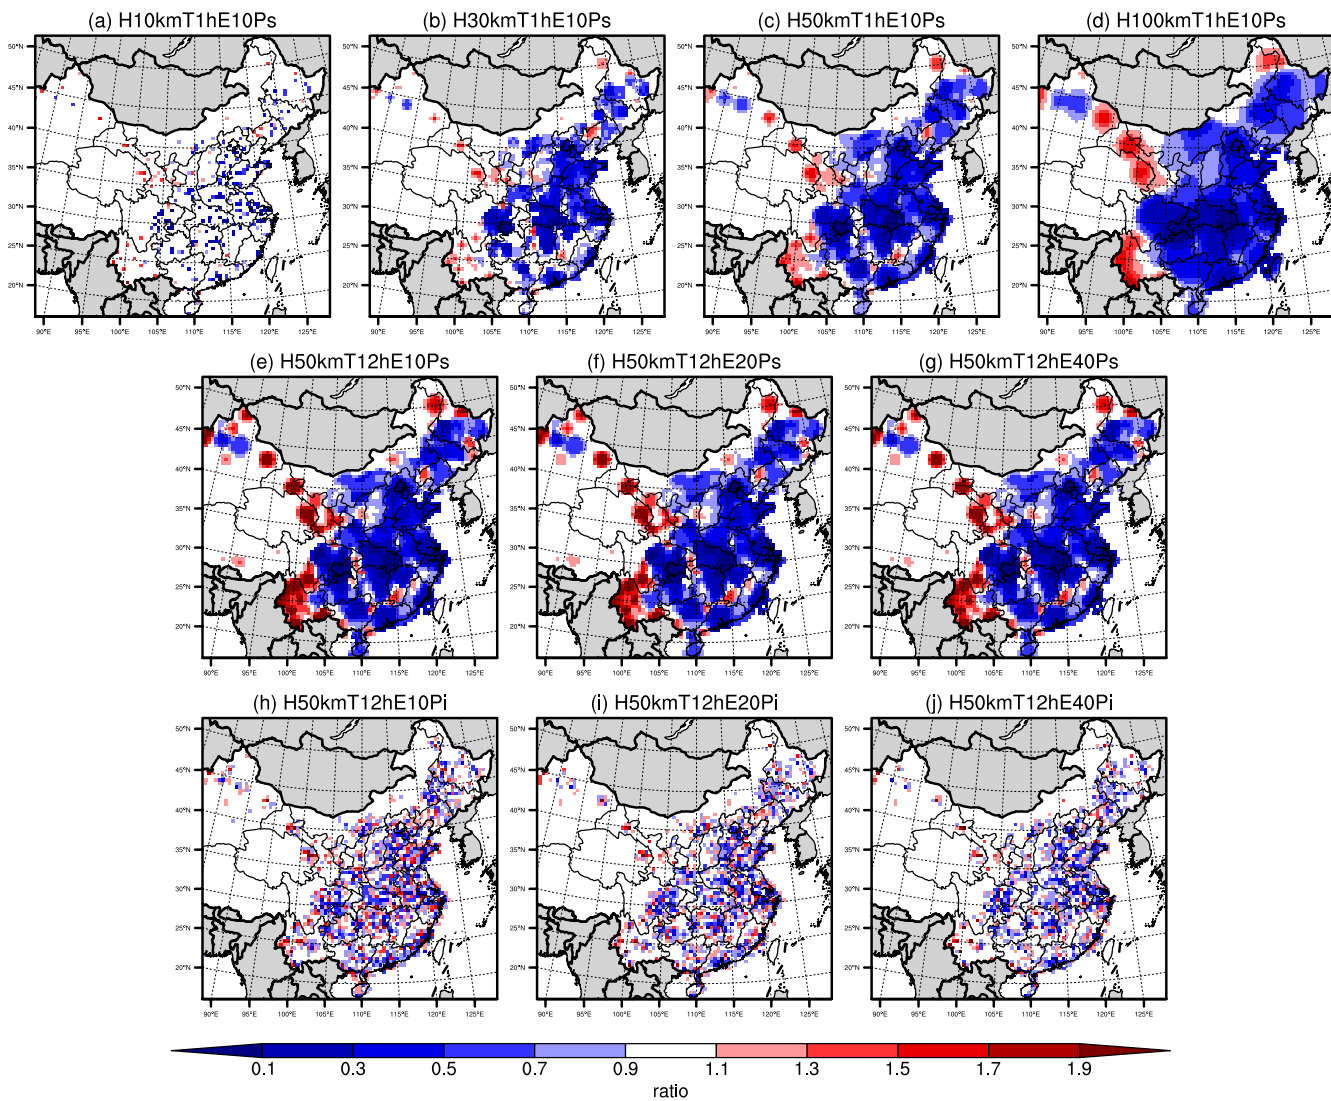

30

**Figure S4. Spatial distributions of the mean ratios between the inverted  $\text{SO}_2$  emissions in various data assimilation experiments and the MIX ones in November 2016.**

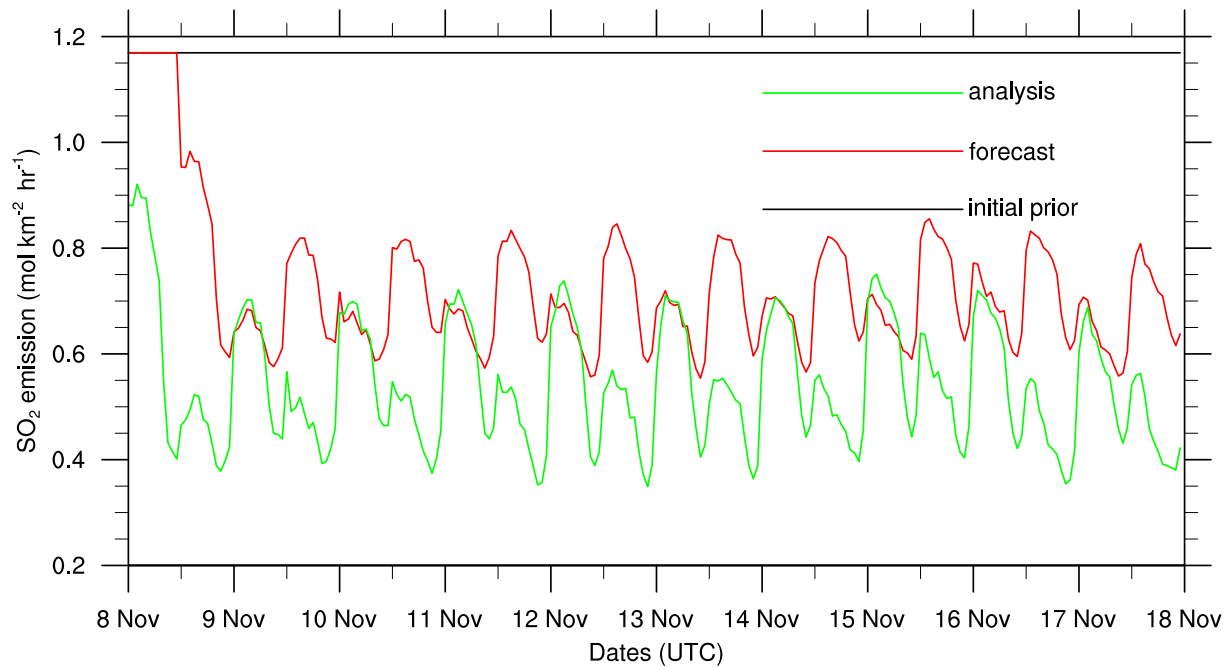

35 **Figure S5.** Time series of the hourly SO<sub>2</sub> emissions averaged over China of the initial MIX prior, the forecast and the analysis of the assimilation experiment H50kmT1hE10Ps from 00:00 UTC 8 November to 23:00 UTC 17 November 2016

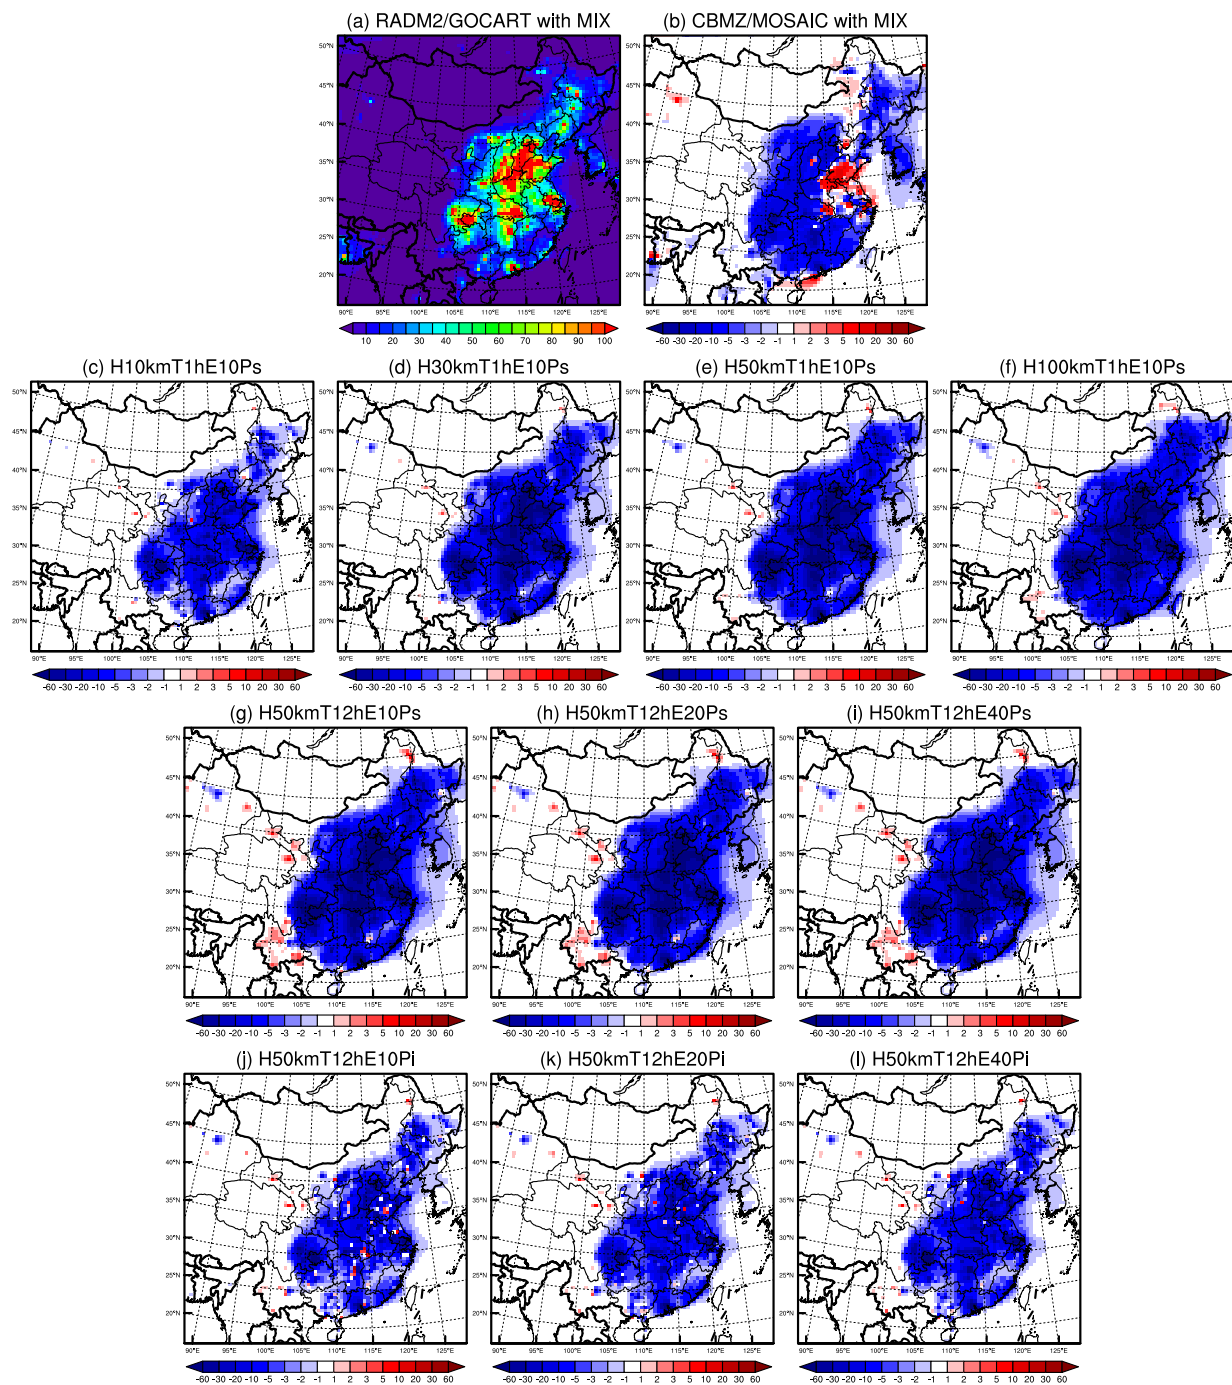

40 **Figure S6.** Spatial distributions of the mean surface SO<sub>2</sub> concentrations simulated with the original MIX emissions (a), the mean differences of the SO<sub>2</sub> concentrations simulated with the CBMZ/MOSAIC chemical scheme minus the ones simulated with RADM2/GOCART (b), and the updates of the simulated SO<sub>2</sub> concentrations with the inverted SO<sub>2</sub> emissions in various data assimilation experiments (c-l).
